# Supplementary material
Source: PubMed Central journal article supplement (PMC5930341)
Supplement: AEM.00004-18_zam009188492s1.pdf [file AEM.00004-18_zam009188492s1.pdf]

1 **TABLES**

2 **Table S1.** Summary data for sequencing data from the 96 PM samples.

| <b>Sample code</b> | <b>Number of raw reads</b> | <b>Number of valid reads</b> | <b>Sample date</b> | <b>Particulate matter type</b> | <b>AQI/day type</b> | <b>Number of OTUs</b> | <b>Good's coverage estimator (%)</b> | <b>Chao1</b> | <b>Shannon</b> |
|--------------------|----------------------------|------------------------------|--------------------|--------------------------------|---------------------|-----------------------|--------------------------------------|--------------|----------------|
| <b>1D</b>          | 29739                      | 28353                        | 9/16/2014          | PM2.5                          | 66/non-haze         | 167                   | 99.91%                               | 180          | 3.32           |
| <b>1E</b>          | 38788                      | 36243                        | 9/16/2014          | PM10                           | 66/non-haze         | 464                   | 99.80%                               | 491          | 5.09           |
| <b>1F</b>          | 41724                      | 39440                        | 9/16/2014          | TSP                            | 66/non-haze         | 255                   | 99.94%                               | 259          | 4.78           |
| <b>2D</b>          | 37512                      | 35795                        | 9/18/2014          | PM2.5                          | 104/light-haze      | 190                   | 99.89%                               | 253          | 4.02           |
| <b>2E</b>          | 39440                      | 36989                        | 9/18/2014          | PM10                           | 104/light-haze      | 243                   | 99.90%                               | 265          | 4.72           |
| <b>2F</b>          | 40132                      | 36390                        | 9/18/2014          | TSP                            | 104/light-haze      | 431                   | 99.81%                               | 453          | 4.12           |
| <b>3D</b>          | 27666                      | 26432                        | 9/20/2014          | PM2.5                          | 173/light-haze      | 135                   | 99.97%                               | 138          | 4.27           |
| <b>3E</b>          | 39074                      | 36580                        | 9/20/2014          | PM10                           | 173/light-haze      | 319                   | 99.87%                               | 347          | 4.62           |
| <b>3F</b>          | 35863                      | 33037                        | 9/20/2014          | TSP                            | 173/light-haze      | 434                   | 99.80%                               | 471          | 5              |
| <b>4D</b>          | 33053                      | 24588                        | 9/21/2014          | PM2.5                          | 116/light-haze      | 389                   | 99.83%                               | 405          | 3.66           |
| <b>4E</b>          | 37783                      | 36840                        | 9/21/2014          | PM10                           | 116/light-haze      | 603                   | 98.70%                               | 814          | 2.35           |
| <b>4F</b>          | 34782                      | 25913                        | 9/21/2014          | TSP                            | 116/light-haze      | 1126                  | 98.86%                               | 1257         | 5.69           |
| <b>5D</b>          | 38202                      | 36716                        | 9/27/2014          | PM2.5                          | 74/non-haze         | 170                   | 99.93%                               | 179          | 3.19           |
| <b>5E</b>          | 39525                      | 35644                        | 9/27/2014          | PM10                           | 74/non-haze         | 1158                  | 98.16%                               | 1423         | 5.34           |
| <b>5F</b>          | 43865                      | 42248                        | 9/27/2014          | TSP                            | 74/non-haze         | 632                   | 98.78%                               | 832          | 2.69           |
| <b>6D</b>          | 28306                      | 26133                        | 9/29/2014          | PM2.5                          | 43/non-haze         | 230                   | 99.94%                               | 233          | 4.41           |
| <b>6E</b>          | 37552                      | 35347                        | 9/29/2014          | PM10                           | 43/non-haze         | 999                   | 98.57%                               | 1190         | 4.82           |
| <b>6F</b>          | 35499                      | 32128                        | 9/29/2014          | TSP                            | 43/non-haze         | 679                   | 99.54%                               | 730          | 5.16           |
| <b>7D</b>          | 42368                      | 40640                        | 9/30/2014          | PM2.5                          | 74/non-haze         | 200                   | 99.94%                               | 206          | 4.39           |

|            |       |       |            |       |                |       |        |      |      |
|------------|-------|-------|------------|-------|----------------|-------|--------|------|------|
| <b>7E</b>  | 42953 | 34879 | 9/30/2014  | PM10  | 74/non-haze    | 973   | 99.04% | 1115 | 5.55 |
| <b>7F</b>  | 44876 | 34274 | 9/30/2014  | TSP   | 74/non-haze    | 1631  | 96.94% | 2124 | 5.86 |
| <b>8D</b>  | 32400 | 30998 | 10/8/2014  | PM2.5 | 328/heavy-haze | 111   | 99.98% | 112  | 3.4  |
| <b>8E</b>  | 40839 | 38431 | 10/8/2014  | PM10  | 328/heavy-haze | 223   | 99.94% | 229  | 4.24 |
| <b>8F</b>  | 34743 | 32294 | 10/8/2014  | TSP   | 328/heavy-haze | 285   | 99.92% | 295  | 4.35 |
| <b>9D</b>  | 43713 | 36782 | 10/9/2014  | PM2.5 | 352/heavy-haze | 314   | 99.85% | 333  | 3.41 |
| <b>9E</b>  | 31003 | 29070 | 10/9/2014  | PM10  | 352/heavy-haze | 216   | 99.90% | 226  | 3.43 |
| <b>9F</b>  | 46539 | 42225 | 10/9/2014  | TSP   | 352/heavy-haze | 327   | 99.74% | 365  | 3.79 |
| <b>10D</b> | 25067 | 24103 | 10/12/2014 | PM2.5 | 15/non-haze    | 186   | 99.94% | 197  | 3.42 |
| <b>10E</b> | 44615 | 41447 | 10/12/2014 | PM10  | 15/non-haze    | 410   | 99.88% | 425  | 4.87 |
| <b>10F</b> | 45518 | 35780 | 10/12/2014 | TSP   | 15/non-haze    | 1,388 | 97.72% | 1733 | 5.79 |
| <b>11D</b> | 33287 | 30246 | 10/17/2014 | PM2.5 | 151/light-haze | 404   | 99.88% | 422  | 5.21 |
| <b>11E</b> | 34413 | 31797 | 10/17/2014 | PM10  | 151/light-haze | 632   | 98.97% | 858  | 4.12 |
| <b>11F</b> | 37073 | 31846 | 10/17/2014 | TSP   | 151/light-haze | 903   | 98.84% | 1175 | 5.61 |
| <b>12D</b> | 39379 | 37658 | 10/18/2014 | PM2.5 | 303/heavy-haze | 199   | 99.93% | 210  | 2.76 |
| <b>12E</b> | 39843 | 36393 | 10/18/2014 | PM10  | 303/heavy-haze | 920   | 98.81% | 1074 | 4.48 |
| <b>12F</b> | 35200 | 22909 | 10/18/2014 | TSP   | 303/heavy-haze | 1485  | 97.73% | 1791 | 5.9  |
| <b>13D</b> | 32629 | 27077 | 10/19/2014 | PM2.5 | 211/heavy-haze | 512   | 99.38% | 592  | 4.05 |
| <b>13E</b> | 38138 | 35198 | 10/19/2014 | PM10  | 211/heavy-haze | 523   | 99.67% | 554  | 4.33 |
| <b>13F</b> | 44430 | 35372 | 10/19/2014 | TSP   | 211/heavy-haze | 1,052 | 99.00% | 1153 | 5.48 |
| <b>14D</b> | 29168 | 28252 | 10/20/2014 | PM2.5 | 144/light-haze | 221   | 99.90% | 236  | 2.56 |
| <b>14E</b> | 36253 | 25547 | 10/20/2014 | PM10  | 144/light-haze | 1,245 | 98.74% | 1369 | 5.92 |
| <b>14F</b> | 30005 | 26327 | 10/20/2014 | TSP   | 144/light-haze | 857   | 99.12% | 974  | 5.29 |
| <b>15D</b> | 32656 | 30915 | 10/23/2014 | PM2.5 | 204/heavy-haze | 281   | 99.70% | 327  | 3.45 |
| <b>15E</b> | 38909 | 36174 | 10/23/2014 | PM10  | 204/heavy-haze | 1,138 | 97.81% | 1486 | 4.54 |
| <b>15F</b> | 44687 | 34823 | 10/23/2014 | TSP   | 204/heavy-haze | 1,424 | 97.55% | 1787 | 5.35 |

|            |       |       |            |       |                |      |        |      |      |
|------------|-------|-------|------------|-------|----------------|------|--------|------|------|
| <b>16D</b> | 33276 | 27270 | 10/30/2014 | PM2.5 | 213/heavy-haze | 424  | 99.65% | 459  | 3.62 |
| <b>16E</b> | 33127 | 26855 | 10/30/2014 | PM10  | 213/heavy-haze | 433  | 99.26% | 539  | 3.17 |
| <b>16F</b> | 30961 | 21116 | 10/30/2014 | TSP   | 213/heavy-haze | 890  | 98.76% | 1036 | 4.43 |
| <b>17D</b> | 34166 | 30685 | 10/31/2014 | PM2.5 | 175/light-haze | 246  | 99.87% | 261  | 3.95 |
| <b>17E</b> | 26659 | 18402 | 10/31/2014 | PM10  | 175/light-haze | 912  | 99.27% | 979  | 4.98 |
| <b>17F</b> | 30291 | 21497 | 10/31/2014 | TSP   | 175/light-haze | 1050 | 98.68% | 1211 | 5.56 |
| <b>18D</b> | 27519 | 20526 | 11/1/2014  | PM2.5 | 31/non-haze    | 466  | 99.70% | 496  | 4.02 |
| <b>18E</b> | 42531 | 33617 | 11/1/2014  | PM10  | 31/non-haze    | 1072 | 98.73% | 1215 | 5.17 |
| <b>18F</b> | 46526 | 32583 | 11/1/2014  | TSP   | 31/non-haze    | 1369 | 98.15% | 1628 | 5.83 |
| <b>19D</b> | 30009 | 22339 | 11/2/2014  | PM2.5 | 48/non-haze    | 904  | 99.06% | 1017 | 4.79 |
| <b>19E</b> | 28345 | 21208 | 11/2/2014  | PM10  | 48/non-haze    | 1061 | 98.97% | 1182 | 5.35 |
| <b>19F</b> | 34573 | 23870 | 11/2/2014  | TSP   | 48/non-haze    | 1578 | 97.59% | 1879 | 5.92 |
| <b>20D</b> | 33468 | 32260 | 11/20/2014 | PM2.5 | 374/heavy-haze | 353  | 99.51% | 418  | 2.62 |
| <b>20E</b> | 42908 | 30080 | 11/20/2014 | PM10  | 374/heavy-haze | 1411 | 98.52% | 1579 | 5.98 |
| <b>20F</b> | 48598 | 33719 | 11/20/2014 | TSP   | 374/heavy-haze | 1674 | 97.72% | 1960 | 6.21 |
| <b>21D</b> | 14674 | 33021 | 11/23/2014 | PM2.5 | 143/light-haze | 335  | 99.85% | 365  | 5.1  |
| <b>21E</b> | 29317 | 32692 | 11/23/2014 | PM10  | 143/light-haze | 452  | 99.82% | 471  | 5.25 |
| <b>21F</b> | 31789 | 40854 | 11/23/2014 | TSP   | 143/light-haze | 547  | 99.81% | 568  | 5.38 |
| <b>22D</b> | 31216 | 21563 | 11/25/2014 | PM2.5 | 250/heavy-haze | 413  | 99.52% | 466  | 3.45 |
| <b>22E</b> | 36289 | 26636 | 11/25/2014 | PM10  | 250/heavy-haze | 1391 | 98.24% | 1628 | 5.93 |
| <b>22F</b> | 39388 | 25794 | 11/25/2014 | TSP   | 250/heavy-haze | 1654 | 97.57% | 1981 | 6.08 |
| <b>23D</b> | 38361 | 27450 | 12/17/2014 | PM2.5 | 138/light-haze | 613  | 99.26% | 691  | 3.74 |
| <b>23E</b> | 48934 | 29970 | 12/17/2014 | PM10  | 138/light-haze | 1566 | 98.03% | 1789 | 5.92 |
| <b>23F</b> | 45283 | 26005 | 12/17/2014 | TSP   | 138/light-haze | 1970 | 96.66% | 2437 | 6.21 |
| <b>24D</b> | 48508 | 29454 | 12/24/2014 | PM2.5 | 37/non-haze    | 537  | 99.41% | 601  | 3.7  |
| <b>24E</b> | 38498 | 34945 | 12/24/2014 | PM10  | 37/non-haze    | 1339 | 97.62% | 1693 | 4.85 |

|            |       |       |            |       |                |      |        |      |      |
|------------|-------|-------|------------|-------|----------------|------|--------|------|------|
| <b>24F</b> | 42479 | 24642 | 12/24/2014 | TSP   | 37/non-haze    | 1427 | 98.08% | 1678 | 5.58 |
| <b>25D</b> | 29598 | 20772 | 1/8/2015   | PM2.5 | 186/light-haze | 794  | 98.77% | 954  | 4.02 |
| <b>25E</b> | 44952 | 30880 | 1/8/2015   | PM10  | 186/light-haze | 1786 | 97.08% | 2175 | 5.76 |
| <b>25F</b> | 29222 | 17782 | 1/8/2015   | TSP   | 186/light-haze | 1906 | 96.83% | 2353 | 6.21 |
| <b>26D</b> | 40022 | 38526 | 1/12/2015  | PM2.5 | 251/heavy-haze | 697  | 99.23% | 803  | 4.36 |
| <b>26E</b> | 33480 | 20095 | 1/12/2015  | PM10  | 251/heavy-haze | 1191 | 97.78% | 1526 | 4.53 |
| <b>26F</b> | 40388 | 27761 | 1/12/2015  | TSP   | 251/heavy-haze | 1801 | 96.69% | 2300 | 5.96 |
| <b>27D</b> | 35654 | 22830 | 1/13/2015  | PM2.5 | 304/heavy-haze | 485  | 99.54% | 531  | 4.14 |
| <b>27E</b> | 42760 | 23195 | 1/13/2015  | PM10  | 304/heavy-haze | 1354 | 97.69% | 1702 | 5.4  |
| <b>27F</b> | 32188 | 18672 | 1/13/2015  | TSP   | 304/heavy-haze | 1323 | 98.48% | 1510 | 5.68 |
| <b>28D</b> | 37799 | 24539 | 1/14/2015  | PM2.5 | 355/heavy-haze | 562  | 99.58% | 599  | 4.17 |
| <b>28E</b> | 39341 | 25331 | 1/14/2015  | PM10  | 355/heavy-haze | 1021 | 98.52% | 1203 | 4.62 |
| <b>28F</b> | 62460 | 34517 | 1/14/2015  | TSP   | 355/heavy-haze | 1556 | 97.45% | 1922 | 5.67 |
| <b>29D</b> | 29759 | 28832 | 1/16/2015  | PM2.5 | 164/light-haze | 512  | 99.20% | 615  | 3.31 |
| <b>29E</b> | 43350 | 30878 | 1/16/2015  | PM10  | 164/light-haze | 1092 | 98.39% | 1286 | 4.57 |
| <b>29F</b> | 32926 | 18291 | 1/16/2015  | TSP   | 164/light-haze | 1151 | 98.67% | 1325 | 5.2  |
| <b>30D</b> | 32503 | 30865 | 1/27/2015  | PM2.5 | 109/light-haze | 174  | 99.94% | 185  | 4.45 |
| <b>30E</b> | 31847 | 28673 | 1/27/2015  | PM10  | 109/light-haze | 498  | 99.79% | 525  | 5.4  |
| <b>30F</b> | 36203 | 31445 | 1/27/2015  | TSP   | 109/light-haze | 874  | 99.70% | 897  | 5.99 |
| <b>31D</b> | 36666 | 32640 | 1/28/2015  | PM2.5 | 24/non-haze    | 155  | 99.64% | 209  | 0.58 |
| <b>31E</b> | 37326 | 28654 | 1/28/2015  | PM10  | 24/non-haze    | 1116 | 97.70% | 1548 | 4.29 |
| <b>31F</b> | 35279 | 25248 | 1/28/2015  | TSP   | 24/non-haze    | 1435 | 98.15% | 1661 | 5.51 |
| <b>32D</b> | 42550 | 41349 | 2/1/2015   | PM2.5 | 170/light-haze | 473  | 99.17% | 643  | 3    |
| <b>32E</b> | 31436 | 21605 | 2/1/2015   | PM10  | 170/light-haze | 1142 | 98.01% | 1389 | 4.76 |
| <b>32F</b> | 73429 | 42943 | 2/1/2015   | TSP   | 170/light-haze | 1555 | 97.38% | 1917 | 5.76 |



5 **Table S2. Environmental factors of 32 sampling dates investigated.**

| Date       | AQI | PM2.5<br>( $\mu\text{g}/\text{m}^3$ ) | PM10<br>( $\mu\text{g}/\text{m}^3$ ) | SO <sub>2</sub><br>( $\mu\text{g}/\text{m}^3$ ) | NO <sub>2</sub><br>( $\mu\text{g}/\text{m}^3$ ) | CO<br>( $\mu\text{g}/\text{m}^3$ ) | Temp<br>(°C) | RH<br>(%) |
|------------|-----|---------------------------------------|--------------------------------------|-------------------------------------------------|-------------------------------------------------|------------------------------------|--------------|-----------|
| 9/16/2014  | 66  | 43                                    | 81                                   | 6                                               | 70                                              | 0.7                                | 18           | 58        |
| 9/18/2014  | 104 | 78                                    | 121                                  | 4                                               | 55                                              | 0.7                                | 20           | 62        |
| 9/20/2014  | 173 | 131                                   | 204                                  | 18                                              | 62                                              | 1.9                                | 22           | 69        |
| 9/21/2014  | 116 | 87                                    | 140                                  | 19                                              | 53                                              | 1.7                                | 22           | 73        |
| 9/27/2014  | 74  | 99                                    | 98                                   | 5                                               | 61                                              | 1                                  | 20           | 60        |
| 9/29/2014  | 43  | 20                                    | 43                                   | 10                                              | 37                                              | 0.6                                | 15           | 45        |
| 9/30/2014  | 74  | 53                                    | 96                                   | 8                                               | 59                                              | 0.8                                | 14           | 53        |
| 10/8/2014  | 328 | 278                                   | 348                                  | 7                                               | 100                                             | 2.6                                | 16           | 84        |
| 10/9/2014  | 352 | 301                                   | 331                                  | 9                                               | 103                                             | 2.3                                | 17           | 85        |
| 10/12/2014 | 15  | 8                                     | 182                                  | 3                                               | 41                                              | 0.3                                | 13           | 25        |
| 10/17/2014 | 151 | 115                                   | 176                                  | 14                                              | 105                                             | 1.6                                | 15           | 56        |
| 10/18/2014 | 303 | 253                                   | 325                                  | 29                                              | 132                                             | 3.2                                | 17           | 68        |
| 10/19/2014 | 211 | 160                                   | 218                                  | 10                                              | 68                                              | 1.2                                | 16           | 83        |
| 10/20/2014 | 144 | 110                                   | 107                                  | 17                                              | 65                                              | 1.3                                | 14           | 59        |
| 10/23/2014 | 204 | 153                                   | 199                                  | 16                                              | 89                                              | 2.2                                | 13           | 79        |
| 10/30/2014 | 213 | 162                                   | 149                                  | 19                                              | 104                                             | 2                                  | 13           | 69        |
| 10/31/2014 | 175 | 132                                   | 142                                  | 6                                               | 61                                              | 1.8                                | 13           | 75        |
| 11/1/2014  | 31  | 10                                    | 30                                   | 6                                               | 30                                              | 0.3                                | 12           | 21        |
| 11/2/2014  | 48  | 23                                    | 48                                   | 4                                               | 43                                              | 0.8                                | 9            | 36        |
| 11/20/2014 | 374 | 324                                   | 383                                  | 12                                              | 121                                             | 4.6                                | 4            | 81        |
| 11/21/2014 | 143 | 109                                   | 145                                  | 10                                              | 76                                              | 2.3                                | 4            | 76        |
| 11/25/2014 | 250 | 200                                   | 242                                  | 16                                              | 88                                              | 3.1                                | 3            | 85        |
| 12/17/2014 | 138 | 105                                   | 159                                  | 65                                              | 89                                              | 3.1                                | -1           | 40        |
| 12/24/2014 | 37  | 12                                    | 23                                   | 16                                              | 56                                              | 0.8                                | 1            | 33        |
| 1/8/2015   | 186 | 140                                   | 162                                  | 34                                              | 104                                             | 2.9                                | 1            | 38        |
| 1/12/2015  | 251 | 206                                   | 245                                  | 35                                              | 74                                              | 2.2                                | -1           | 57        |
| 1/13/2015  | 304 | 254                                   | 280                                  | 46                                              | 98                                              | 2.9                                | -1           | 64        |
| 1/14/2015  | 355 | 304                                   | 318                                  | 27                                              | 101                                             | 3.8                                | -2           | 83        |
| 1/16/2015  | 164 | 125                                   | 140                                  | 14                                              | 34                                              | 0.5                                | -1           | 30        |
| 1/27/2015  | 109 | 82                                    | 89                                   | 11                                              | 44                                              | 0.7                                | -3           | 25        |
| 1/28/2015  | 24  | 16                                    | 22                                   | 29                                              | 53                                              | 10.3                               | -1           | 43        |
| 2/1/2015   | 170 | 129                                   | 98                                   | 41                                              | 82                                              | 2.4                                | -2           | 35        |

7 **Table S3. Percent of dominant phyla, orders, and genera.**

| Phylum                 | Percent | Order             | Percent | Genus                      | Percent |                           |      |
|------------------------|---------|-------------------|---------|----------------------------|---------|---------------------------|------|
| Proteobacteria         | 38.5%   | Pseudomonadales   | 7.4%    | <i>Acinetobacter</i>       | 3.8%    |                           |      |
|                        |         |                   |         | <i>Pseudomonas</i>         | 2.7%    |                           |      |
|                        |         |                   |         | <i>Psychrobacter</i>       | 0.5%    |                           |      |
|                        |         |                   |         | <i>Moraxella</i>           | 0.2%    |                           |      |
|                        |         | Burkholderiales   | 5.6%    |                            |         | <i>Comamonas</i>          | 1.9% |
|                        |         |                   |         |                            |         | <i>Massilia</i>           | 1.1% |
|                        |         |                   |         |                            |         | <i>Achromobacter</i>      | 0.4% |
|                        |         |                   |         |                            |         | <i>Schlegelella</i>       | 0.4% |
|                        |         |                   |         |                            |         | <i>Limnobacter</i>        | 0.3% |
|                        |         | Rhizobiales       | 5.0%    |                            |         | <i>Methylobacterium</i>   | 1.9% |
|                        |         |                   |         |                            |         | <i>Ensifer</i>            | 1.4% |
|                        |         |                   |         |                            |         | <i>Rhizobium</i>          | 0.5% |
|                        |         |                   |         |                            |         | <i>Devosia</i>            | 0.3% |
|                        |         |                   |         |                            |         | <i>Aureimonas</i>         | 0.2% |
|                        |         |                   |         |                            |         | <i>Microvirga</i>         | 0.2% |
|                        |         | Enterobacteriales | 4.7%    |                            |         | <i>Shigella</i>           | 2.2% |
|                        |         |                   |         |                            |         | <i>Enterobacter</i>       | 1.7% |
|                        |         |                   |         |                            |         | <i>Pantoea</i>            | 0.5% |
|                        |         | Rhodobacterales   | 3.9%    |                            |         | <i>Paracoccus</i>         | 2.5% |
|                        |         |                   |         |                            |         | <i>Rubellimicrobium</i>   | 1.1% |
|                        |         | Sphingomonadales  | 3.4%    |                            |         | <i>Sphingomonas</i>       | 2.5% |
|                        |         |                   |         |                            |         | <i>Altererythrobacter</i> | 0.3% |
|                        |         | Methylophilales   | 1.9%    |                            |         | <i>Methylophilus</i>      | 1.1% |
| <i>Methylobacillus</i> | 0.8%    |                   |         |                            |         |                           |      |
| Xanthomonadales        | 1.9%    |                   |         | <i>Silanimonas</i>         | 1.2%    |                           |      |
| Rhodospirillales       | 1.1%    |                   |         | <i>Roseomonas</i>          | 0.3%    |                           |      |
|                        |         |                   |         | <i>Skermanella</i>         | 0.2%    |                           |      |
| Neisseriales           | 0.5%    |                   |         | <i>Neisseria</i>           | 0.5%    |                           |      |
| Pasteurellales         | 0.4%    |                   |         | <i>Haemophilus</i>         | 0.4%    |                           |      |
| Caulobacterales        | 0.4%    |                   |         | <i>Brevundimonas</i>       | 0.3%    |                           |      |
| Rickettsiales          | 0.4%    |                   |         | <i>Mitochondria_norank</i> | 0.4%    |                           |      |
| Rhodocyclales          | 0.3%    |                   |         | <i>Methyloversatilis</i>   | 0.2%    |                           |      |
| Alteromonadales        | 0.2%    |                   |         | <i>Shewanella</i>          | 0.2%    |                           |      |
| Firmicutes             | 26.8%   | Bacillales        | 16.1%   | <i>Anoxybacillus</i>       | 6.6%    |                           |      |
|                        |         |                   |         | <i>Staphylococcus</i>      | 2.5%    |                           |      |
|                        |         |                   |         | <i>Bacillus</i>            | 1.5%    |                           |      |
|                        |         |                   |         | <i>Brevibacillus</i>       | 0.7%    |                           |      |
|                        |         |                   |         | <i>Paenibacillus</i>       | 0.7%    |                           |      |
|                        |         |                   |         | <i>Tumebacillus</i>        | 0.7%    |                           |      |
|                        |         |                   |         | <i>Planococcus</i>         | 0.7%    |                           |      |
|                        |         |                   |         | <i>Oxalophagus</i>         | 0.7%    |                           |      |

|                      |       |                     |      |                         |      |                           |      |
|----------------------|-------|---------------------|------|-------------------------|------|---------------------------|------|
|                      |       |                     |      | <i>Exiguobacterium</i>  | 0.2% |                           |      |
|                      |       |                     |      | <i>Virgibacillus</i>    | 0.2% |                           |      |
|                      |       |                     |      | <i>Jeotgalicoccus</i>   | 0.2% |                           |      |
|                      |       | Clostridiales       | 6.7% |                         |      | <i>Clostridium</i>        | 1.1% |
|                      |       |                     |      |                         |      | <i>Romboutsia</i>         | 0.6% |
|                      |       |                     |      |                         |      | <i>Ezakiella</i>          | 0.6% |
|                      |       |                     |      |                         |      | <i>Peptoniphilus</i>      | 0.5% |
|                      |       |                     |      |                         |      | <i>Anaerococcus</i>       | 0.3% |
|                      |       |                     |      |                         |      | <i>Mogibacterium</i>      | 0.2% |
|                      |       |                     |      |                         |      | Lactobacillales           | 3.4% |
| <i>Lactobacillus</i> | 0.7%  |                     |      |                         |      |                           |      |
| Erysipelotrichales   | 0.5%  |                     |      | <i>Turicibacter</i>     | 0.3% |                           |      |
| Actinobacteria       | 17.2% | Micrococcales       | 7.9% |                         |      | <i>Kocuria</i>            | 1.7% |
|                      |       |                     |      |                         |      | <i>Cellulomonas</i>       | 1.7% |
|                      |       |                     |      |                         |      | <i>Arthrobacter</i>       | 1.0% |
|                      |       |                     |      |                         |      | <i>Micrococcus</i>        | 0.5% |
|                      |       |                     |      |                         |      | <i>Ornithinimicrobium</i> | 0.4% |
|                      |       |                     |      |                         |      | <i>Brachybacterium</i>    | 0.4% |
|                      |       |                     |      |                         |      | <i>Yonghaparkia</i>       | 0.3% |
|                      |       |                     |      |                         |      | <i>Frondehabitans</i>     | 0.3% |
|                      |       |                     |      |                         |      | <i>Ornithinibacter</i>    | 0.3% |
|                      |       |                     |      |                         |      | <i>Microbacterium</i>     | 0.2% |
|                      |       | Corynebacteriales   | 2.8% |                         |      | <i>Corynebacterium</i>    | 2.2% |
|                      |       |                     |      |                         |      | <i>Dietzia</i>            | 0.3% |
|                      |       | Propionibacteriales | 1.9% |                         |      | <i>Propionibacterium</i>  | 0.7% |
|                      |       |                     |      |                         |      | <i>Nocardioides</i>       | 0.5% |
|                      |       |                     |      |                         |      | <i>Marmoricola</i>        | 0.3% |
| Frankiales           | 1.1%  |                     |      | <i>Blastococcus</i>     | 0.6% |                           |      |
| Streptomyetales      | 0.5%  |                     |      | <i>Streptomyces</i>     | 0.5% |                           |      |
| Streptosporangiales  | 0.4%  |                     |      | <i>Nocardioopsis</i>    | 0.3% |                           |      |
| Bacteroidetes        | 7.7%  | Sphingobacteriales  | 2.2% |                         |      | <i>Flavisolibacter</i>    | 0.6% |
|                      |       |                     |      |                         |      | <i>Arcticibacter</i>      | 0.2% |
|                      |       |                     |      |                         |      | <i>Sphingobacterium</i>   | 0.2% |
|                      |       |                     |      |                         |      | <i>Taibaiella</i>         | 0.2% |
|                      |       | Cytophagales        | 2.0% |                         |      | <i>Hymenobacter</i>       | 0.5% |
|                      |       |                     |      |                         |      | <i>Algoriphagus</i>       | 0.4% |
|                      |       |                     |      |                         |      | <i>Pontibacter</i>        | 0.2% |
|                      |       | Bacteroidales       | 1.9% |                         |      | <i>Bacteroides</i>        | 0.8% |
| Flavobacteriales     | 1.6%  |                     |      | <i>Flavobacterium</i>   | 0.8% |                           |      |
|                      |       |                     |      | <i>Chryseobacterium</i> | 0.3% |                           |      |
|                      |       |                     |      | <i>Myroides</i>         | 0.2% |                           |      |
| Deinococcus-Thermus  | 5.2%  | Thermales           | 4.5% |                         |      | <i>Thermus</i>            | 2.5% |
|                      |       |                     |      |                         |      | <i>Meiothermus</i>        | 1.9% |



|               |      |                |      |                          |      |
|---------------|------|----------------|------|--------------------------|------|
|               |      | Deinococcales  | 0.7% | <i>Deinococcus</i>       | 0.7% |
| Cyanobacteria | 1.4% | Pleurocapsales | 0.7% | <i>Chroococcidiopsis</i> | 0.4% |
|               |      |                |      | <i>Gloeocapsopsis</i>    | 0.2% |

9 **Table S4. Information on the dominant bacterial genera (>1%) associated with**  
 10 **PM2.5, PM10, and TSP.**

| Genus                   | Percent in PM2.5 | Percent in PM10 | Percent in TSP |
|-------------------------|------------------|-----------------|----------------|
| <i>Anoxybacillus</i>    | 9.5%             | 7.1%            | 3.1%           |
| <i>Acinetobacter</i>    | 5.4%             | 3.6%            | 2.4%           |
| <i>Pseudomonas</i>      | 4.0%             | 1.3%            | 2.9%           |
| <i>Sphingomonas</i>     | 1.6%             | 2.6%            | 3.5%           |
| <i>Staphylococcus</i>   | 3.9%             | 2.2%            | 1.6%           |
| <i>Thermus</i>          | 3.3%             | 2.9%            | 1.4%           |
| <i>Paracoccus</i>       | 1.0%             | 2.6%            | 3.8%           |
| <i>Shigella</i>         | 3.8%             | 2.0%            | 0.8%           |
| <i>Corynebacterium</i>  | 2.1%             | 2.4%            | 2.0%           |
| <i>Comamonas</i>        | 3.0%             | 2.0%            | 0.8%           |
| <i>Meiothermus</i>      | 3.1%             | 1.8%            | 0.9%           |
| <i>Methylobacterium</i> | 1.9%             | 1.9%            | 1.9%           |
| <i>Enterobacter</i>     | 2.5%             | 2.3%            | 0.3%           |
| <i>Kocuria</i>          | 0.5%             | 1.8%            | 2.7%           |
| <i>Cellulomonas</i>     | 3.5%             | 0.7%            | 0.8%           |
| <i>Bacillus</i>         | 1.7%             | 1.4%            | 1.3%           |
| <i>Streptococcus</i>    | 1.5%             | 1.4%            | 1.4%           |
| <i>Ensifer</i>          | 3.5%             | 0.4%            | 0.4%           |
| <i>Silanimonas</i>      | 1.8%             | 1.2%            | 0.5%           |
| <i>Clostridium</i>      | 0.4%             | 1.5%            | 1.5%           |
| <i>Massilia</i>         | 0.5%             | 1.6%            | 1.2%           |
| <i>Rubellimicrobium</i> | 0.4%             | 1.2%            | 1.7%           |
| <i>Methylophilus</i>    | 0.9%             | 0.4%            | 1.9%           |
| <i>Arthrobacter</i>     | 0.4%             | 1.1%            | 1.5%           |

12 **Table S5. Information on the dominant bacterial genera (>1%) in non-, light-, and**  
 13 **heavy-haze samples.**

14

| Genus                   | Percent in non-haze | Percent in light-haze | Percent in heavy-haze |
|-------------------------|---------------------|-----------------------|-----------------------|
| <i>Anoxybacillus</i>    | 5.66%               | 6.03%                 | 7.87%                 |
| <i>Acinetobacter</i>    | 3.30%               | 3.61%                 | 4.40%                 |
| <i>Pseudomonas</i>      | 3.08%               | 2.23%                 | 3.00%                 |
| <i>Sphingomonas</i>     | 3.47%               | 2.54%                 | 1.80%                 |
| <i>Staphylococcus</i>   | 3.58%               | 2.18%                 | 2.09%                 |
| <i>Thermus</i>          | 2.06%               | 2.25%                 | 3.24%                 |
| <i>Paracoccus</i>       | 2.88%               | 2.46%                 | 2.15%                 |
| <i>Shigella</i>         | 2.13%               | 1.55%                 | 2.95%                 |
| <i>Corynebacterium</i>  | 1.96%               | 2.16%                 | 2.34%                 |
| <i>Comamonas</i>        | 1.47%               | 2.14%                 | 2.08%                 |
| <i>Meiothermus</i>      | 2.40%               | 1.09%                 | 2.45%                 |
| <i>Methylobacterium</i> | 1.88%               | 2.06%                 | 1.66%                 |
| <i>Enterobacter</i>     | 0.41%               | 2.87%                 | 1.42%                 |
| <i>Kocuria</i>          | 1.68%               | 1.97%                 | 1.33%                 |
| <i>Cellulomonas</i>     | 4.12%               | 0.63%                 | 0.76%                 |
| <i>Bacillus</i>         | 0.86%               | 1.80%                 | 1.65%                 |
| <i>Streptococcus</i>    | 0.87%               | 1.45%                 | 1.93%                 |
| <i>Ensifer</i>          | 0.18%               | 1.82%                 | 2.00%                 |
| <i>Silanimonas</i>      | 1.29%               | 0.88%                 | 1.35%                 |
| <i>Clostridium</i>      | 0.90%               | 1.07%                 | 1.42%                 |
| <i>Massilia</i>         | 1.30%               | 0.90%                 | 1.15%                 |
| <i>Rubellimicrobium</i> | 1.14%               | 1.30%                 | 0.80%                 |
| <i>Methylophilus</i>    | 3.20%               | 0.16%                 | 0.28%                 |
| <i>Arthrobacter</i>     | 0.80%               | 1.31%                 | 0.73%                 |

15

16 **Table S6. Permutation test of Canonical correspondence analysis.**

|                 | CCA1     | CCA2     | r <sup>2</sup> | Pr(>r) |
|-----------------|----------|----------|----------------|--------|
| PM2.5           | -0.01603 | 0.99987  | 0.0280         | 0.288  |
| PM10            | -0.29290 | 0.95614  | 0.1028         | 0.006  |
| SO <sub>2</sub> | 0.99003  | -0.14088 | 0.2855         | 0.001  |
| NO <sub>2</sub> | -0.74160 | -0.67084 | 0.0081         | 0.681  |
| CO              | 0.99694  | 0.07819  | 0.0910         | 0.019  |
| Temp            | -0.98966 | 0.14343  | 0.7174         | 0.001  |
| RH              | -0.98068 | 0.19561  | 0.1209         | 0.003  |

17

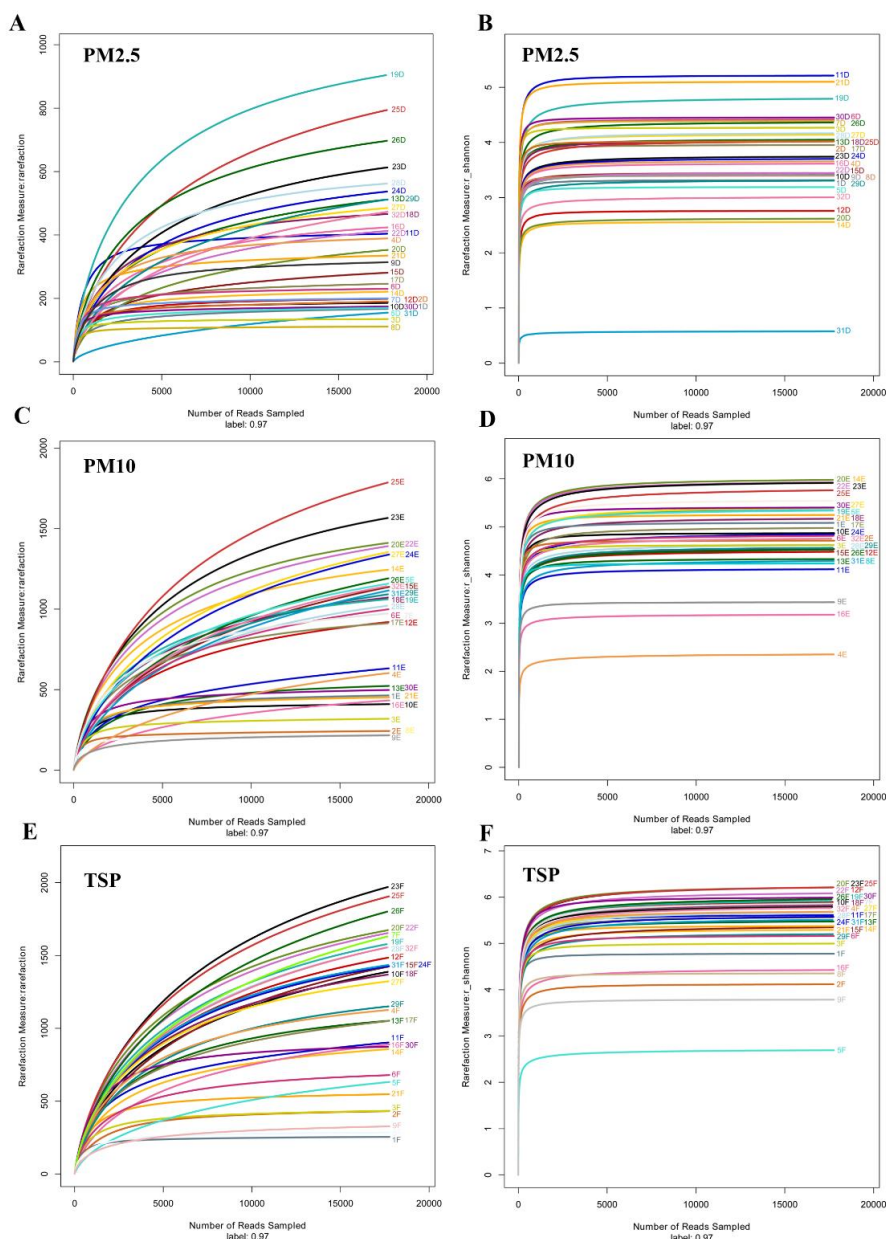

19  
 20 Fig. S1 The rarefaction curves and Shannon index curves of PM samples.(A) Rarefaction curves of  
 21 PM2.5 samples; (B) Shannon index curves of PM2.5 samples; (C) Rarefaction curves of PM10 samples;  
 22 (D) Shannon index curves of PM10 samples; (E) Rarefaction curves of TSP samples; (F) Shannon index  
 23 curves of TSP samples.

24  
 25  
 26

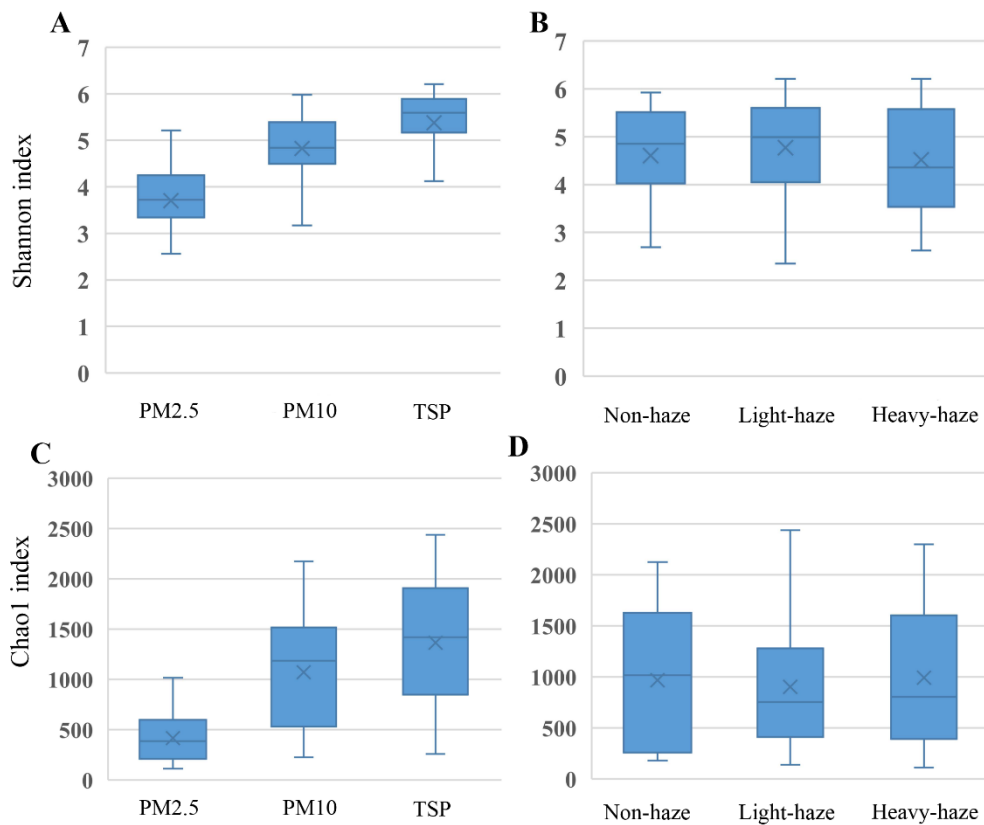

28

29

Fig. S2 Statistical comparisons of Chao1 and Shannon index among three PM fractions (PM2.5, PM10, TSP) and three haze levels (non-, light-, and heavy-haze). (A) Differences of Shannon index among three PM samples; (B) Difference of Shannon index among three haze-level samples; (C) Difference of Chao1 index among three PM samples; (D) Difference of Chao1 index among three haze-level samples.

30

31

32

33

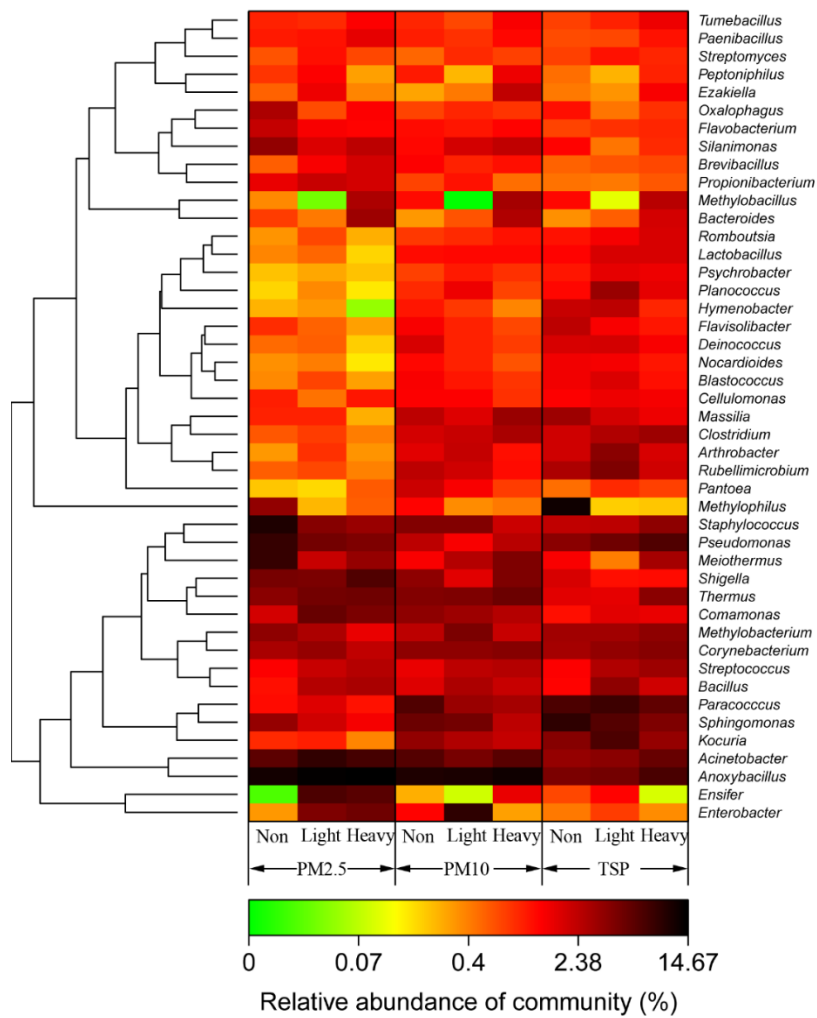

34

35 Fig. S3 A heatmap diagram showing the distribution of the dominant bacterial genera in three PM  
 36 fractions (PM2.5, PM10, and TSP) and three haze levels (non-, light-, and heavy-haze). A tree was  
 37 constructed based on Bray-Curtis distance among bacterial genera.

38

39

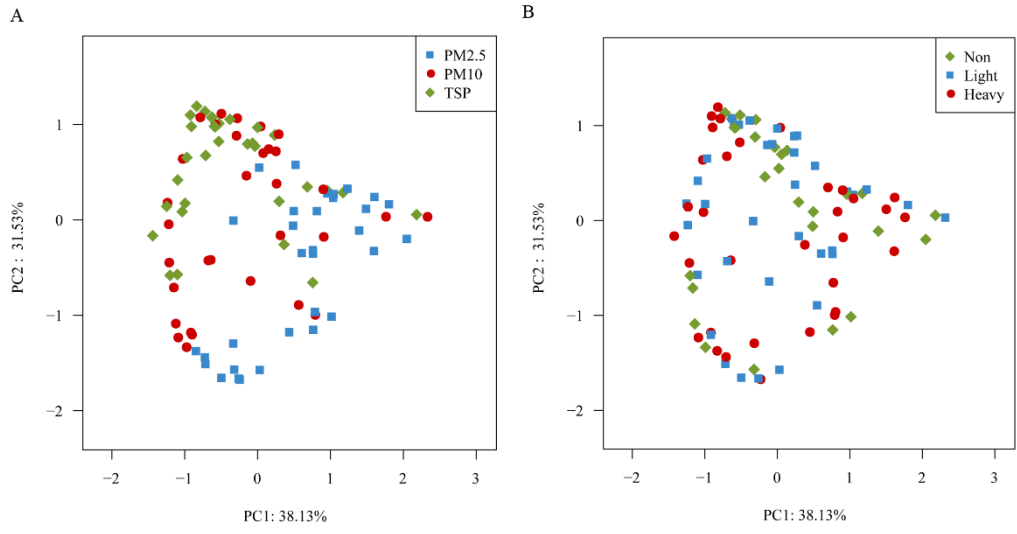

40

41 Fig. S4 Principal co-ordinates analysis based on Bray-Curtis distance in three PM fractions (A) and  
 42 three haze levels (B).

43



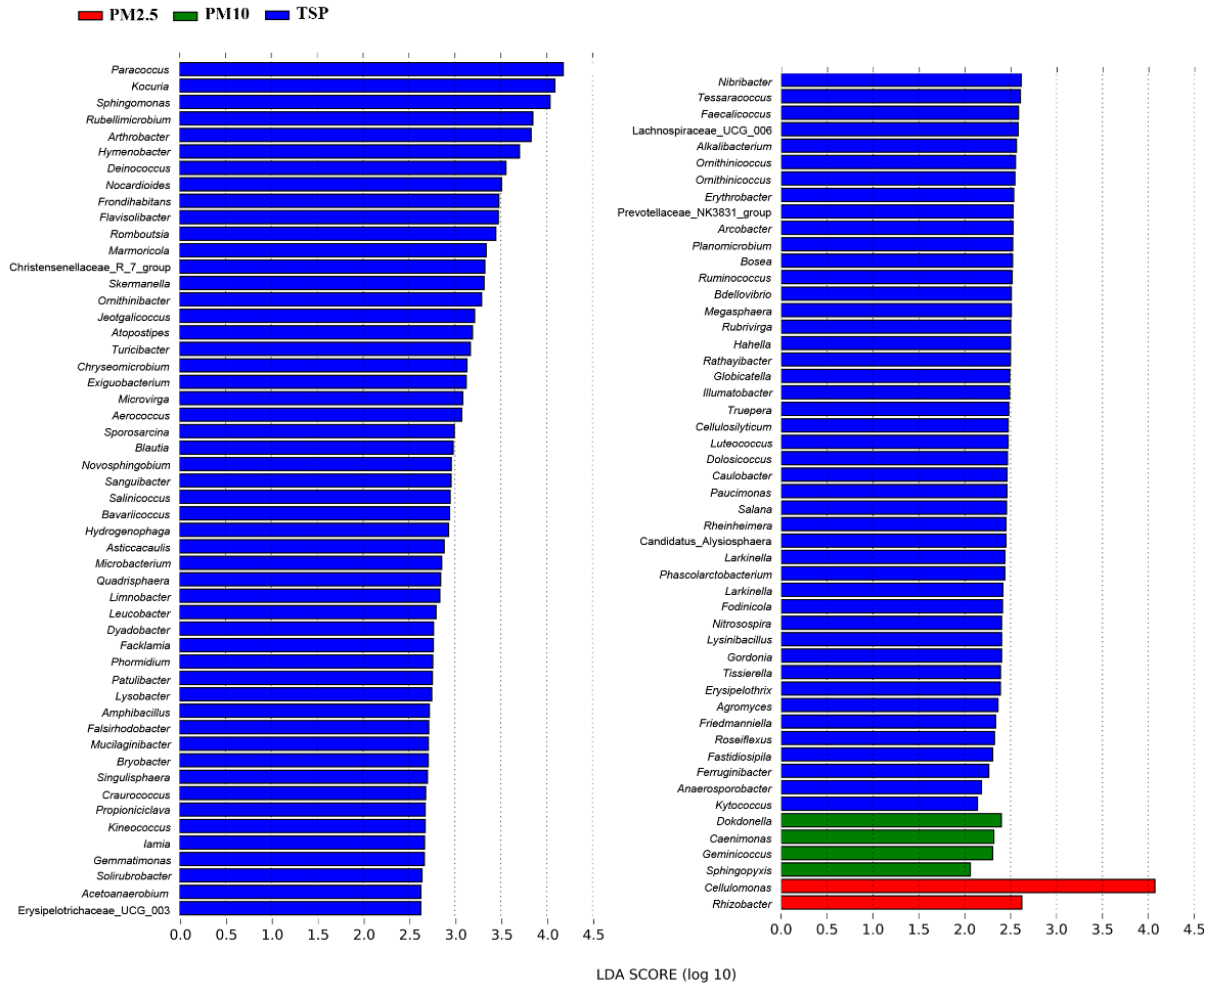

44

45 Fig. S5 LEfSe analysis illustrating differentially abundant bacterial taxa among different PM-fraction  
 46 samples.

47
